# Supplementary material
Source: PubMed Central journal article supplement (PMC7558717)
Supplement: NIHMS1627994-supplement-SupplementaryTables.pdf [file NIHMS1627994-supplement-SupplementaryTables.pdf]

In the format provided by the authors and unedited.

# Three-dimensional genome restructuring across timescales of activity-induced neuronal gene expression

Jonathan A. Beagan<sup>1</sup>, Elissa D. Pastuzyn<sup>2</sup>, Lindsey R. Fernandez<sup>1</sup>, Michael H. Guo<sup>3</sup>,  
Kelly Feng<sup>1</sup>, Katelyn R. Titus<sup>1</sup>, Harshini Chandrashekar <sup>1</sup>, Jason D. Shepherd <sup>2,4</sup>  and  
Jennifer E. Phillips-Cremins <sup>1,5,6</sup> 

---

<sup>1</sup>Department of Bioengineering, University of Pennsylvania, Philadelphia, PA, USA. <sup>2</sup>Department of Neurobiology and Anatomy, The University of Utah, Salt Lake City, Utah, USA. <sup>3</sup>Department of Neurology, Hospital of the University of Pennsylvania, Philadelphia, PA, USA. <sup>4</sup>Department of Biochemistry, The University of Utah, Salt Lake City, Utah, USA. <sup>5</sup>Epigenetics Institute, Perelman School of Medicine, University of Pennsylvania, Philadelphia, PA, USA. <sup>6</sup>Department of Genetics, University of Pennsylvania, Philadelphia, PA, USA. e-mail: [jason.shepherd@neuro.utah.edu](mailto:jason.shepherd@neuro.utah.edu); [jcremins@seas.upenn.edu](mailto:jcremins@seas.upenn.edu)

## Supplemental Table of Contents

### **I. Supplemental Tables**

Table S1 – Summary of new 5C datasets provided in this study

Table S2 – Summary of new RNA-seq datasets provided in this study

Table S3 – Transcripts per million (TPM) counts across DIV and activation time points for RefSeq transcriptome

Table S4 – Results of the Sleuth Wald test for differential expression

Table S5 – Summary of previously published HiC datasets analyzed

Table S6 – 5C Loop Calls

Table S7 – Summary of new ChIP-seq datasets provided in this study

Table S8 – H3K27ac Peaks called in the Bic condition (called using MACS2 --broad, pvalue and broadPeak cutoff thresholds =  $1e-8$ )

Table S9 – H3K27ac Peaks called in the Untreat condition (called using MACS2 --broad, pvalue and broadPeak cutoff thresholds =  $1e-8$ )

Table S10 – H3K27ac Peaks called in the TTX condition (called using MACS2 --broad, pvalue and broadPeak cutoff thresholds =  $1e-8$ )

Table S11 – Putative distal enhancer regions parsed as being Bic-specific based on H3K27ac signal

Table S12 – Putative distal enhancer regions parsed as being activity invariant based on H3K27ac signal

Table S13 – Putative distal enhancer regions parsed as being TTX-specific based on H3K27ac signal

Table S14 – Loops called on mouse ES cell HiC from Bonev et al. 2017

Table S15 – Loops called on mouse NPC HiC from Bonev et al. 2017

Table S16 – Loops called on mouse cortical neuron (CN) HiC from Bonev et al. 2017

Table S17 - Loops called on human cortical plate (CP) tissue HiC from Won et al. 2016

Table S18 - Loops called on human germinal zone (GZ) tissue HiC from Won et al. 2016

Table S19 - Classified genes opposite disease-Associated SNVs

**Supplemental Tables**

**Table S1. Summary of new 5C datasets provided in this study**

| <b>Condition</b> | <b>Rep</b> | <b>Cell Type</b> | <b>Primer Set*</b> | <b>5C Sequencing Run</b> | <b>Total Mapped Reads (Paired End 1)</b> | <b>Total Mapped Reads (Paired End 2)</b> |
|------------------|------------|------------------|--------------------|--------------------------|------------------------------------------|------------------------------------------|
| Bic (DIV16)      | 1          | Cortical Neuron  | Activity           | 1                        | 15629758                                 | 13994700                                 |
| Bic (DIV16)      | 2          | Cortical Neuron  | Activity           | 1                        | 17872216                                 | 16068115                                 |
| Bic (DIV16)      | 3          | Cortical Neuron  | Activity           | 2                        | 13358656                                 | 13182759                                 |
| Bic (DIV16)      | 4          | Cortical Neuron  | Activity           | 2                        | 12761525                                 | 12560359                                 |
| Bic (DIV16)      | 1          | Cortical Neuron  | Synaptic           | 1                        | 21489169                                 | 19378693                                 |
| Bic (DIV16)      | 2          | Cortical Neuron  | Synaptic           | 1                        | 14655973                                 | 13225858                                 |
| Bic (DIV16)      | 3          | Cortical Neuron  | Synaptic           | 2                        | 11258574                                 | 11108043                                 |
| Bic (DIV16)      | 4          | Cortical Neuron  | Synaptic           | 2                        | 10640297                                 | 10455808                                 |
| TTX (DIV16)      | 1          | Cortical Neuron  | Activity           | 1                        | 19957660                                 | 18061209                                 |
| TTX (DIV16)      | 2          | Cortical Neuron  | Activity           | 1                        | 19462095                                 | 17617327                                 |
| TTX (DIV16)      | 3          | Cortical Neuron  | Activity           | 2                        | 11475372                                 | 11280130                                 |
| TTX (DIV16)      | 4          | Cortical Neuron  | Activity           | 2                        | 11576011                                 | 11376399                                 |
| TTX (DIV16)      | 1          | Cortical Neuron  | Synaptic           | 1                        | 17730187                                 | 16044486                                 |
| TTX (DIV16)      | 2          | Cortical Neuron  | Synaptic           | 1                        | 22476694                                 | 20350478                                 |
| TTX (DIV16)      | 3          | Cortical Neuron  | Synaptic           | 2                        | 12489964                                 | 12229149                                 |
| TTX (DIV16)      | 4          | Cortical Neuron  | Synaptic           | 2                        | 12474307                                 | 12266865                                 |
| Untreat (DIV16)  | 1          | Cortical Neuron  | Activity           | 1                        | 20574076                                 | 18647762                                 |
| Untreat (DIV16)  | 2          | Cortical Neuron  | Activity           | 1                        | 19880857                                 | 17961279                                 |
| Untreat (DIV16)  | 3          | Cortical Neuron  | Activity           | 2                        | 10041836                                 | 9843702                                  |
| Untreat (DIV16)  | 4          | Cortical Neuron  | Activity           | 2                        | 10897728                                 | 10658216                                 |
| Untreat (DIV16)  | 1          | Cortical Neuron  | Synaptic           | 1                        | 24964591                                 | 22576821                                 |
| Untreat (DIV16)  | 2          | Cortical Neuron  | Synaptic           | 1                        | 17861704                                 | 16068258                                 |
| Untreat (DIV16)  | 3          | Cortical Neuron  | Synaptic           | 2                        | 11232157                                 | 11041243                                 |
| Untreat (DIV16)  | 4          | Cortical Neuron  | Synaptic           | 2                        | 10945734                                 | 10777809                                 |

\*5C Primer Sets:

Activity = BDNF, FOS, ARC

Synaptic = NRXN1, SYT1, NLGN3

**Table S2 – Summary of new RNA-seq datasets provided in this study**

| Condition | Rep Name                   | Sequenced Reads | Mapped Reads (RefSeq Transcriptome) |
|-----------|----------------------------|-----------------|-------------------------------------|
| DIV5      | DIV5_2-2-17_Rep1           | 66596616        | 42931843                            |
| Div5      | DIV5_2-2-17_Rep2           | 66127710        | 43785136                            |
| Div5      | DIV5_2-5-17_Rep2           | 74490452        | 45382360                            |
| Untreated | DIV16_Untreat_2-13-17_Rep1 | 76292600        | 45728980                            |
| Untreated | DIV16_Untreat_2-13-17_Rep2 | 70313996        | 43709559                            |
| Untreated | DIV16_Untreat_2-16-17_Rep2 | 73031884        | 41965444                            |
| TTX       | DIV16_TTX_2-13-17_Rep1     | 67865345        | 42933935                            |
| TTX       | DIV16_TTX_2-13-17_Rep2     | 71808738        | 43452817                            |
| TTX       | DIV16_TTX_2-16-17_Rep1     | 80579287        | 54155741                            |
| Bic       | DIV16_Bicuc_2-13-17_Rep1   | 71158871        | 46802769                            |
| Bic       | DIV16_Bicuc_2-13-17_Rep2   | 70726507        | 43333176                            |
| Bic       | DIV16_Bicuc_2-16-17_Rep2   | 76301581        | 46085188                            |

**Table S3 –Transcripts per million (TPM) counts across DIV and activation time points for RefSeq transcriptome**

Provided in separate spreadsheet.

**Table S4 – Results of the Sleuth Wald test for differential expression**

Provided in separate spreadsheet.

**Table S5 – Summary of previously published HiC datasets analyzed**

| Tissue/Cell Type | Rep           | Total Mapped Reads (Paired End 1) | Total Mapped Reads (Paired End 2) | Total Valid Pairs | Assembly | GEO Sample ID | Reference           |
|------------------|---------------|-----------------------------------|-----------------------------------|-------------------|----------|---------------|---------------------|
| ES               | 1             | 2456874859                        | 2410167937                        | 1694547628        | mm9      | GSM2533818    | (Bonev et al. 2017) |
| ES               | 2             | 1263130596                        | 1228304467                        | 874261374         | mm9      | GSM2533819    | (Bonev et al. 2017) |
| ES               | 3             | 2673778757                        | 2640856932                        | 1861707555        | mm9      | GSM2533820    | (Bonev et al. 2017) |
| ES               | 4             | 508261688                         | 499843892                         | 355266330         | mm9      | GSM2533821    | (Bonev et al. 2017) |
| <b>ES</b>        | <b>merged</b> | <b>6902045900</b>                 | <b>6779173228</b>                 | <b>4785782887</b> |          |               |                     |
| NPC              | 1             | 1224587101                        | 1216240550                        | 850812082         | mm9      | GSM2533822    | (Bonev et al. 2017) |
| NPC              | 2             | 2076449282                        | 2073685785                        | 1425496094        | mm9      | GSM2533823    | (Bonev et al. 2017) |
| NPC              | 3             | 1443846007                        | 1437360743                        | 967787722         | mm9      | GSM2533824    | (Bonev et al. 2017) |
| NPC              | 4             | 3538265465                        | 3534220365                        | 2465796658        | mm9      | GSM2533825    | (Bonev et al. 2017) |

| <b>NPC</b>             | <b>merged</b> | <b>8283147855</b> | <b>8261507443</b> | <b>5709892556</b> |      |            |                     |
|------------------------|---------------|-------------------|-------------------|-------------------|------|------------|---------------------|
| Cortical Neuron        | 1             | 742260464         | 738703350         | 510995484         | mm9  | GSM2533826 | (Bonev et al. 2017) |
| Cortical Neuron        | 2             | 741509478         | 736455469         | 515304241         | mm9  | GSM2533827 | (Bonev et al. 2017) |
| Cortical Neuron        | 3             | 1050785183        | 1052901789        | 732518157         | mm9  | GSM2533828 | (Bonev et al. 2017) |
| Cortical Neuron        | 4             | 1668657503        | 1662949431        | 1163551034        | mm9  | GSM2533829 | (Bonev et al. 2017) |
| Cortical Neuron        | 5             | 2324686938        | 2092692067        | 1430515014        | mm9  | GSM2533830 | (Bonev et al. 2017) |
| Cortical Neuron        | 6             | 1797395887        | 1792866442        | 1237396926        | mm9  | GSM2533831 | (Bonev et al. 2017) |
| <b>Cortical Neuron</b> | <b>merged</b> | <b>8325295453</b> | <b>8076568548</b> | <b>5590280856</b> |      |            |                     |
| Cortical Plate         | 1             | 680901460         | 669828525         | 477401617         | hg19 | GSM2054564 | (Won et al. 2016)   |
| Cortical Plate         | 2             | 668075261         | 655925822         | 479063672         | hg19 | GSM2054565 | (Won et al. 2016)   |
| Cortical Plate         | 3             | 502608925         | 489115991         | 362837579         | hg19 | GSM2054566 | (Won et al. 2016)   |
| <b>Cortical Plate</b>  | <b>merged</b> | <b>1851585646</b> | <b>1814870338</b> | <b>1319302868</b> |      |            |                     |
| Germinal Zone          | 1             | 682518562         | 675056439         | 487874057         | hg19 | GSM2054567 | (Won et al. 2016)   |
| Germinal Zone          | 2             | 696799199         | 689981271         | 503166075         | hg19 | GSM2054568 | (Won et al. 2016)   |
| Germinal Zone          | 3             | 523694404         | 512704502         | 384384534         | hg19 | GSM2054569 | (Won et al. 2016)   |
| <b>Germinal Zone</b>   | <b>merged</b> | <b>1903012165</b> | <b>1877742212</b> | <b>1375424666</b> |      |            |                     |

**Table S6 – 5C Loop Calls**

Provided in separate spreadsheet.

**Table S7 – Summary of new ChIP-seq datasets provided in this study**

| <b>Target</b> | <b>Condition</b> | <b>Cell Type</b> | <b>Mapped Test ChIP-seq Reads</b> | <b>Number non-redundant tags utilized (after down-sampling)</b> | <b>Control Samples</b>      | <b>Mapped Control ChIP-seq Reads</b> | <b>Number non-redundant tags utilized (after down-sampling)</b> |
|---------------|------------------|------------------|-----------------------------------|-----------------------------------------------------------------|-----------------------------|--------------------------------------|-----------------------------------------------------------------|
| H3K27ac       | Bic              | Cortical Neuron  | 41021267                          | 38000000                                                        | Bic Treated Cortical Neuron | 47530457                             | 44000000                                                        |
| H3K27ac       | TTX              | Cortical Neuron  | 56699076                          | 38000000                                                        | TTX Treated Cortical Neuron | 52796934                             | 44000000                                                        |

|         |         |                 |          |          |                           |          |          |
|---------|---------|-----------------|----------|----------|---------------------------|----------|----------|
| H3K27ac | Untreat | Cortical Neuron | 66252853 | 38000000 | Untreated Cortical Neuron | 83933042 | 44000000 |
|---------|---------|-----------------|----------|----------|---------------------------|----------|----------|

**Table S8 – H3K27ac Peaks called in the Bic condition (called using MACS2 --broad, pvalue and broadPeak cutoff thresholds = 1e-8)**

Provided in separate spreadsheet.

**Table S9 – H3K27ac Peaks called in the Untreat condition (called using MACS2 --broad, pvalue and broadPeak cutoff thresholds = 1e-8)**

Provided in separate spreadsheet.

**Table S10 – H3K27ac Peaks called in the TTX condition (called using MACS2 --broad, pvalue and broadPeak cutoff thresholds = 1e-8)**

Provided in separate spreadsheet.

**Table S11 – Putative distal enhancer regions parsed as being Bic-specific based on H3K27ac signal**

Provided in separate spreadsheet.

**Table S12 – Putative distal enhancer regions parsed as being activity invariant based on H3K27ac signal**

Provided in separate spreadsheet.

**Table S13 – Putative distal enhancer regions parsed as being TTX-specific based on H3K27ac signal**

Provided in separate spreadsheet.

**Table S14 – Loops called on mouse ES cell HiC from Bonev et al. 2017**

Provided in separate spreadsheet.

**Table S15 – Loops called on mouse NPC HiC from Bonev et al. 2017**

Provided in separate spreadsheet.

**Table S16 – Loops called on mouse cortical neuron (CN) HiC from Bonev et al. 2017**

Provided in separate spreadsheet.

**Table S17 - Loops called on human cortical plate (CP) tissue HiC from Won et al. 2016**

Provided in separate spreadsheet.

**Table S18 - Loops called on human germinal zone (GZ) tissue HiC from Won et al. 2016**

Provided in separate spreadsheet.

**Table S19 - Classified genes opposite disease-Associated SNVs**

Provided in separate spreadsheet.

## **REFERENCES**

1. Wang, J., Vasaiakar, S., Shi, Z., Greer, M. & Zhang, B. WebGestalt 2017: a more comprehensive, powerful, flexible and interactive gene set enrichment analysis toolkit. *Nucleic Acids Res* **45**, W130-W137 (2017).
